# Supplementary material
Source: PubMed Central journal article supplement (PMC5984519)
Supplement: pnas.1800407115.sapp.pdf [file pnas.1800407115.sapp.pdf]

## Supporting information Materials and Methods

Keenan Stears, Douglas J. McCauley, Jacques C. Finlay, James Mpemba, Ian T. Warrington, Benzeth M. Mutayoba, Mary E. Power, Todd E. Dawson, and Justin S. Brashares

### **Estimating watershed-level shifts in water chemistry, biological diversity, and fish abundance.**

#### *Dissolved oxygen*

To quantify the impact of *Hippopotamus amphibius* on dissolved oxygen (DO) concentration at the watershed scale, we used a two-step process. The first step involved estimating the DO concentration across the Greater Ruaha watershed under the observed *H. amphibius* densities (obtained from the 2015 dry season *H. amphibius* aerial census of the Greater Ruaha watershed conducted during our study). To do this, we calculated *H. amphibius* density for all river pools identified from the *H. amphibius* aerial census (n = 60 pools). This census identified all river pools that we deemed suitable for *H. amphibius* habitat and that were large enough to sustain aquatic biological diversity during the dry season. We calculated the volume for all focal pools on the ground as described previously. We then calculated pool volume for non-focal pools from satellite imagery and used an average pool depth that we calculated from field measurements of our focal *H. amphibius* pools.

To incorporate both *H. amphibius* density and pool volume, we categorized all *H. amphibius* pools into high- and low-density *H. amphibius* pools. This categorization was based on the 50% percentile for *H. amphibius* density (any pool that fell below the 50% percentile was deemed a low-density *H. amphibius* pool and any pool above the 50% percentile was termed high-density). Because there was no field observed relationship between pool volume and DO concentration in our focal pools, we plotted DO concentration against *H. amphibius* density for

all our focal *H. amphibius* pools in the 2015 dry season (n = 6 high-density *H. amphibius* pools, n = 6 low-density *H. amphibius* pools). We fitted a trendline to these data ( $P < 0.001$ ;  $r^2 = 0.87$ ; Figure S4) and used the corresponding equation to estimate the DO concentration for non-focal *H. amphibius* pools of a given *H. amphibius* density. After assigning these values to all documented pools in the Greater Ruaha watershed, we estimated a grand mean value for the watershed by averaging across all 60 pools in the watershed

The second step involved estimating DO concentrations at the watershed scale in a hypothetical scenario in which all *H. amphibius* were absent from the Greater Ruaha watershed. To do this, we plotted *H. amphibius* density against DO concentration using only the data from our focal low-density *H. amphibius* pools for the 2015 dry season (n = 6 low-density *H. amphibius* pools). However, here we found no relationship between plotted *H. amphibius* density against DO concentration in this sub-set of pools. As such, we estimated the DO concentration of all pools across the Greater Ruaha watershed in this *H. amphibius* absent scenario using the average DO concentration of our low-density *H. amphibius* pools. After assigning these values to all documented pools in the Greater Ruaha watershed, we estimated a grand mean value for the watershed by averaging across all 60 pools in the watershed. Comparisons of the outputs generated from the two different scenarios were used to assess the net impact of *H. amphibius* on DO concentration of the Greater Ruaha watershed.

#### *Fish and aquatic invertebrate diversity*

We largely repeated a slightly modified version of the above described two-step approach to calculate the net impact of *H. amphibius* on fish diversity, aquatic invertebrate diversity, total fish abundance, and tilapia abundance in the Greater Ruaha watershed using data from the 2015

dry season. Fish and aquatic invertebrate diversity was measured using the integrative Hill number index and species richness.

To estimate the watershed-level Hill number fish diversity (i.e. gamma diversity) under the observed 2015 dry season *H. amphibius* densities, we combined data on field measured fish species composition and abundance from all focal *H. amphibius* pools (n = 6 high-density *H. amphibius* pools, n = 6 low-density *H. amphibius* pools). Because our 2015 dry season *H. amphibius* aerial surveys revealed that high- and low-density *H. amphibius* pools were not evenly distributed across the Greater Ruaha watershed (33 high-density *H. amphibius* pools and 27 low-density *H. amphibius* pools), we weighted the fish abundance values obtained from focal high- and low-density sampling by the observed availability of high- and low-density *H. amphibius* pools across the watershed. From this, we summed the resultant weighted fish data for both the high- and low-density *H. amphibius* pools to calculate a single Hill number estimate of fish diversity for the Greater Ruaha watershed (i.e. gamma diversity). To calculate the diversity of fish species in respect to species richness across the Greater Ruaha watershed, we summed the total number of unique fish species detected in focal sampling of both high- and low-density *H. amphibius* pools (see Table S5). We repeated the same process to calculate Hill number diversity and species richness for aquatic invertebrate diversity for the Greater Ruaha watershed.

Secondly, we estimated Hill number measured fish diversity (i.e. gamma diversity) across the Greater Ruaha watershed in the absence of *H. amphibius*. For analyses in this second scenario, we only used fish species composition and abundance from field sampling of focal low-density *H. amphibius* pools (n = 6 low-density *H. amphibius* pools). We summed fish abundance for each species across all low-density focal *H. amphibius* pools to calculate an aggregate Hill number fish diversity for the Greater Ruaha watershed largely lacking *H.*

*amphibius*. To estimate fish species richness in this scenario, we simply summed the total number of unique fish species found in each focal low-density *H. amphibius* pool (see Table S5). We repeated the same process to calculate Hill number diversity and species richness of aquatic invertebrate diversity for the Greater Ruaha watershed in a scenario largely lacking *H. amphibius*.

We estimated the net impact of *H. amphibius* abundance on fish diversity in the Greater Ruaha watershed by subtracting Hill number and species richness defined measures of fish diversity obtained in the scenario with *H. amphibius* from corresponding fish diversity measures obtained when *H. amphibius* were absent. The same calculation was applied to calculate the net impact of *H. amphibius* on aquatic invertebrate diversity.

#### *Distribution of fish diversity across pools in the Greater Ruaha watershed.*

For graphical representation of the distribution of Hill number fish diversity at the pool scale (i.e. alpha diversity) in the Greater Ruaha watershed, we estimated fish diversity under the observed *H. amphibius* densities during the 2015 dry season. To incorporate both *H. amphibius* density and pool volume, we categorized all *H. amphibius* pools into high and low-density *H. amphibius* pools using the same steps outlined above. For the 2015 dry season focal high-density pools, we found no relationship between fish diversity and pool volume. Furthermore, we found no relationship between *H. amphibius* density and fish diversity. Thus, we used the mean fish diversity calculated from our focal high-density *H. amphibius* pools as the estimate of fish diversity across all high-density *H. amphibius* pools in the Greater Ruaha watershed. However, for low-density *H. amphibius* pools, we found a significant linear relationship ( $P=0.0005$ ) between pool volume and fish diversity. We plotted the trendline ( $r^2= 0.96$ ; Figure S5) and used

the resulting equation to calculate fish diversity for non-focal *H. amphibius* pools. This approach allowed us to assign alpha-level Hill number derived fish diversity values to all documented pools in the Greater Ruaha watershed (see Figure 6 in the main text).

#### *Distribution of aquatic invertebrate diversity across pools in the Greater Ruaha watershed.*

For graphical representation of the distribution of Hill number aquatic invertebrate diversity at the pool scale (i.e. alpha diversity) in the Greater Ruaha watershed, we estimated aquatic invertebrate diversity under the observed *H. amphibius* densities during the 2015 dry season. To incorporate both *H. amphibius* density and pool volume, we categorized all *H. amphibius* pools into high and low-density *H. amphibius* pools using the same steps outlined above. We found no relationship between aquatic invertebrate diversity and pool volume for both high-and low-density *H. amphibius* pools. As a result, we plotted *H. amphibius* density against aquatic invertebrate diversity using data from all focal *H. amphibius* pools (n = 6 high-density *H. amphibius* pools, n = 6 low-density *H. amphibius* pools). We fitted a trendline to these data ( $P = 0.002$ ;  $r^2 = 0.68$ ; Figure S6) and used the corresponding equation to estimate the aquatic invertebrate diversity for non-focal *H. amphibius* pools of a given *H. amphibius* density. This approach allowed us to assign alpha-level Hill number derived aquatic invertebrate diversity values to all documented pools in the Greater Ruaha watershed (see Figure 6 in the main text).

#### *Fish abundance*

To estimate the relative changes in watershed-level fish abundance (the sum of all fish species) under the observed *H. amphibius* densities during the 2015 dry season, we categorized all *H. amphibius* pools into high and low-density *H. amphibius* pools as described above. For high-density *H. amphibius* we removed a single outlier pool that had ~14 times as many fish

compared to other high-density *H. amphibius* pools. We found no relationship between fish abundance and pool volume for both high-and low-density *H. amphibius* pools. As a result, we plotted *H. amphibius* density against fish abundance using data from all focal *H. amphibius* pools (n = 5 high-density *H. amphibius* pools, n = 6 low-density *H. amphibius* pools). We used the fitted trendline ( $P = 0.03$ ,  $r^2 = 0.54$ ; Figure S7) to calculate relative fish abundance for all non-focal pools in the watershed. After assigning these values to each pool, we then summed these values across all pools to calculate the relative fish abundance in the Greater Ruaha watershed.

Secondly, we estimated total fish abundance in the absence of *H. amphibius*. As outlined in step one, we found no relationship between total fish abundance and pool volume, nor a relationship between total fish abundance and *H. amphibius* density using data only from low-density *H. amphibius* pools (n = 6 low-density *H. amphibius* pools). Consequently, we used the average fish abundance calculated from our focal low-density *H. amphibius* pools as an estimate of the total fish abundance in all low-density *H. amphibius* pools. After assigning each pool their value, we summed these data to calculate the total fish abundance for the Greater Ruaha watershed. The net impact of *H. amphibius* on total fish abundance of the Greater Ruaha watershed was calculated by subtracting total fish abundance obtained when *H. amphibius* were present from the total fish abundance obtained in the scenario without *H. amphibius* from the

#### *Tilapia abundance*

Potential impacts upon the relative changes in watershed-level tilapia abundance were examined separately owing to the nutritional and socio-economic importance of these fish. For these analyses, we only used data for the dominant tilapia species in our field count data (*Oreochromis urolepis*). As above, we first estimated relative tilapia abundance under the observed *H. amphibius* densities. Because of the relationship between fish abundance, pool volume, and *H.*

*amphibius* density, we split all the pools into high-and low-density *H. amphibius* pools, using the steps outline above. For our focal high-density *H. amphibius* pools (n = 6 high-density *H. amphibius* pools), we found a significant relationship between tilapia abundance and pool volume. We used the fitted trendline ( $P = 0.05$ ;  $r^2 = 0.76$ ; Figure S8) to estimate relative tilapia abundance for all high-density *H. amphibius* pools in the Greater Ruaha watershed. By contrast, we found no relationship between tilapia abundance and pool volume for our focal low-density *H. amphibius* pools (n = 6 low-density *H. amphibius* pools). Furthermore, we found no relationship between tilapia abundance and *H. amphibius* density for low-density *H. amphibius* pools. As such, we used the average tilapia abundance calculated from our focal low-density *H. amphibius* pools as an estimate of the relative tilapia abundance in all low-density *H. amphibius* pools. After assigning these values to each pool, we then summed these values across all pools to calculate the relative tilapia abundance in the Greater Ruaha watershed.

To estimate tilapia abundance in the absence of *H. amphibius*, we only used data from low-density *H. amphibius* pools (n = 6 low-density *H. amphibius* pools). As stated above, we found no relationship between tilapia abundance and pool volume, nor a relationship between tilapia abundance and *H. amphibius* density using data only from low-density *H. amphibius* pools (n = 6 low-density *H. amphibius* pools). Consequently, we used the average tilapia abundance calculated from our focal low-density *H. amphibius* pools as an estimate of the tilapia abundance in all low-density *H. amphibius* pools. After assigning each pool their value, we summed these data to calculate relative tilapia abundance for the Greater Ruaha watershed. The net impact of *H. amphibius* on relative tilapia abundance of the Greater Ruaha watershed was calculated by subtracting tilapia abundance obtained when *H. amphibius* were present from the tilapia abundance obtained in the scenario without *H. amphibius*.

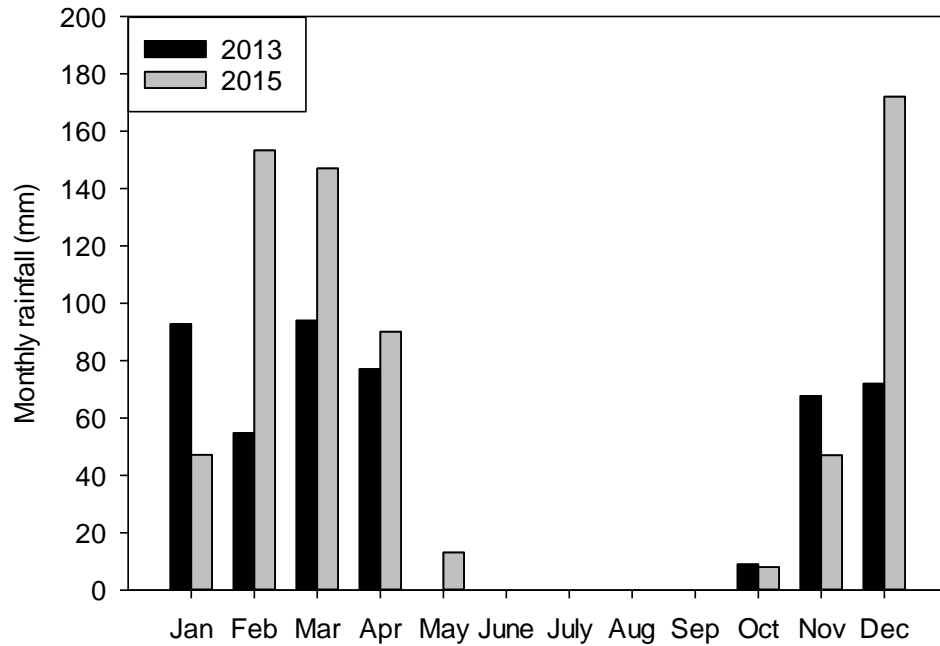

**Figure S1:** Monthly rainfall (mm) for Ruaha National Park, Tanzania, during 2013 and 2015.

The hydrology of the Great Ruaha River tracked monthly rainfall. Although rainfall ceased in April and May, the Great Ruaha River maintained flow until mid-October. The river did not flow from mid-October until the rains arrived in late November. The rainfall in October did not result in significant increases in river flow at our study pools.



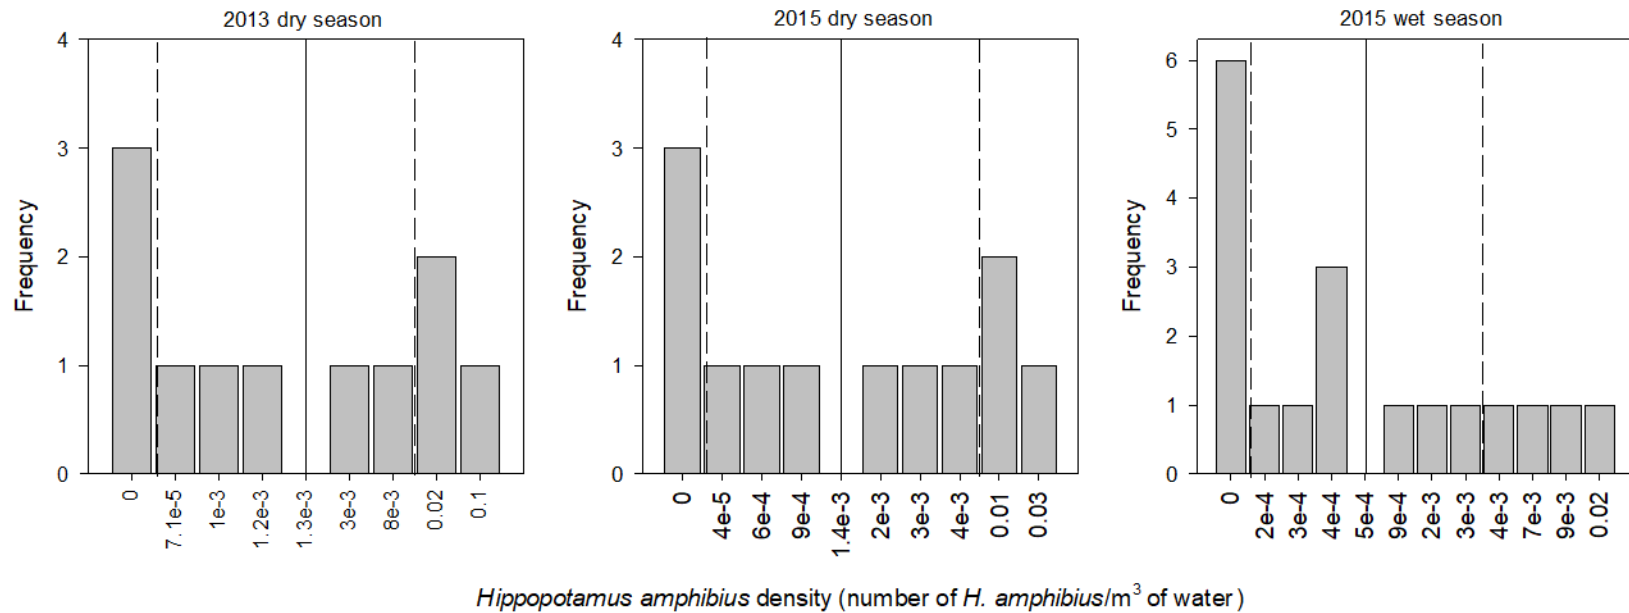

**Figure S2:** Frequency distribution of *Hippopotamus amphibius* density in river pools in the dry seasons of 2013 and 2015 as well as the wet season of 2015. We used the 50% quartile value (solid line) for each sampling period to differentiate between low- and high-density *H. amphibius* pools. In addition, we included the 25% and 75% percentile (dashed lines) and in most cases more pools were either below or above these percentiles, indicating good separation between treatments. Although a number of pools fell between the 25% and 50% percentile, the magnitude in difference between the highest density value below the 50% quartile and the lowest density value above the 50% quartile was bigger than the magnitude in difference between the different densities below the 50% quartile. Thus, we are confident in using the 50% quartile value as a means of differentiating between low- and high-density *H. amphibius* pools.

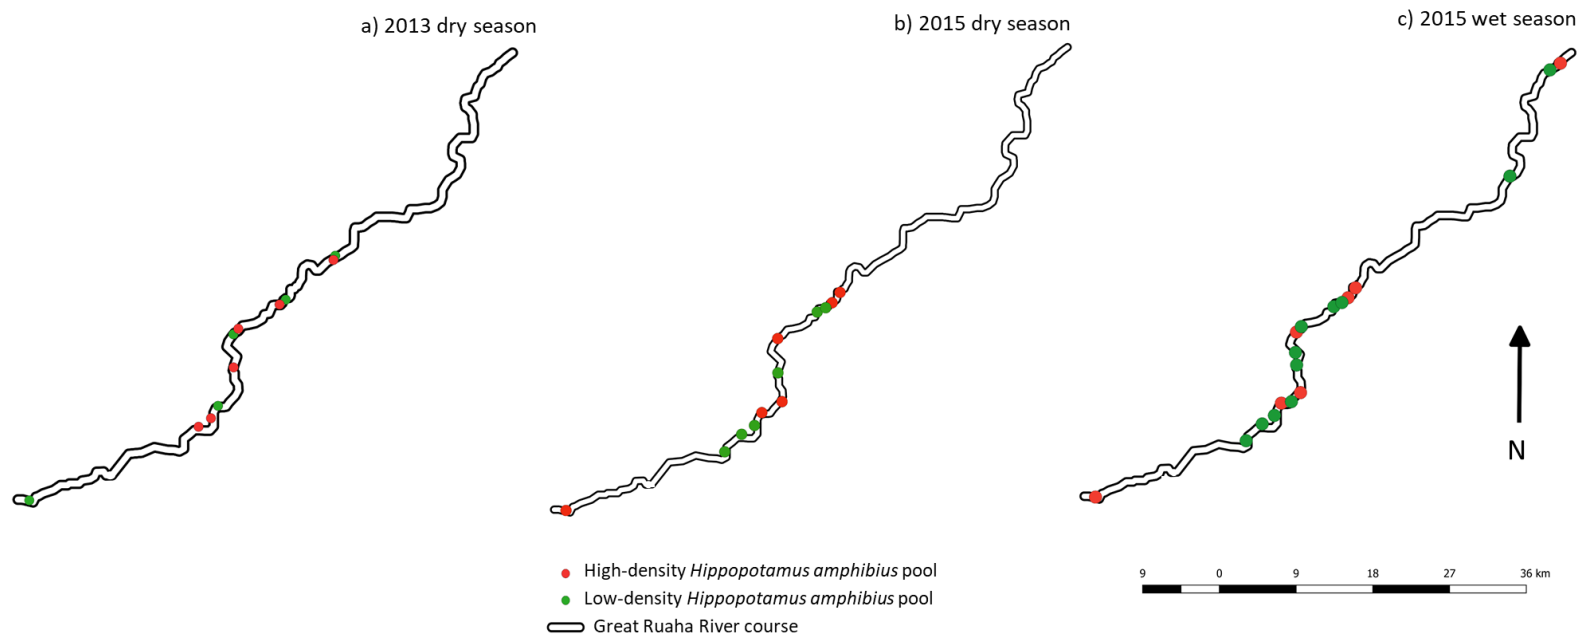

**Figure S3:** Map of study sites. High-and low-density *Hippopotamus amphibius* pools were interspersed across the study area of the Great Ruaha River for each of the three sampling periods: a) 2013 dry season, b) 2015 dry season, and c) 2015 wet season.

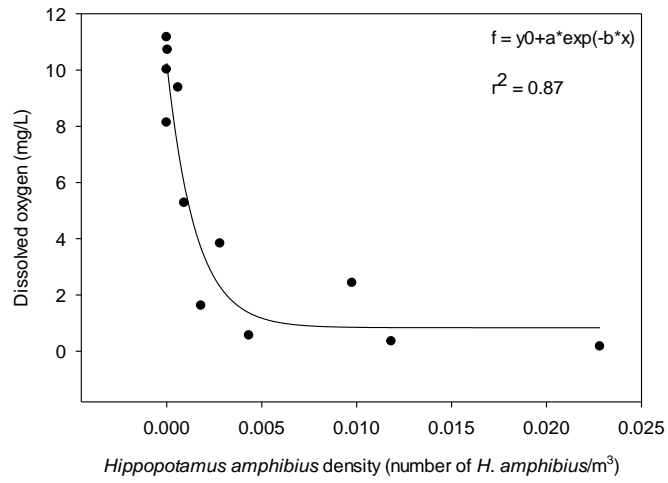

**Figure S4:** Relationship between dissolved oxygen (DO, mg/L) and *Hippopotamus amphibius* density plotted using data from all focal *H. amphibius* pools during the dry season of 2015. These data were used to estimate the DO concentration of all pools in the Greater Ruaha watershed.

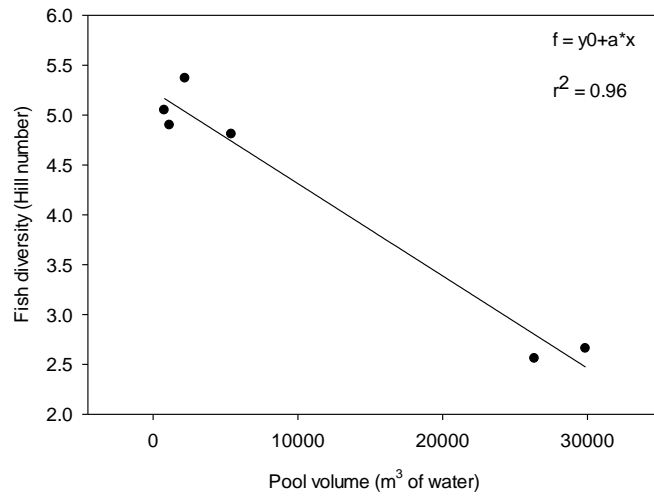

**Figure S5:** Relationship between fish diversity and pool volume plotted using data from low-density *H. amphibius* pools during the dry season of 2015. These data were used to estimate the fish diversity of all pools in the Greater Ruaha watershed.

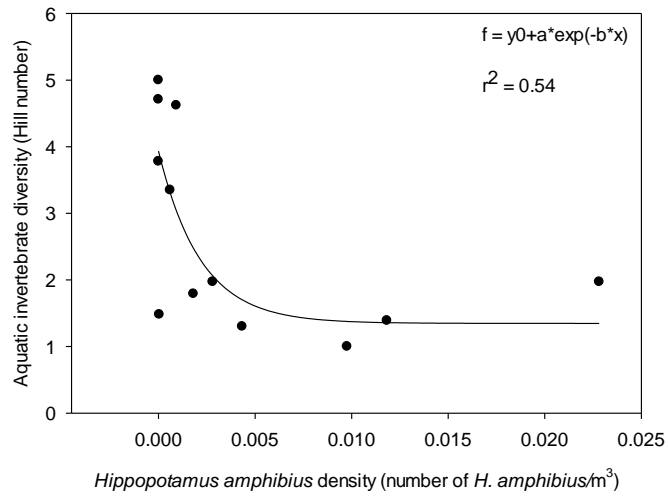

**Figure S6:** Relationship between aquatic invertebrate diversity and *Hippopotamus amphibius* density plotted using data from all focal *H. amphibius* pools during the dry season of 2015. These data were used to estimate the aquatic invertebrate diversity of all pools in the Greater Ruaha watershed.

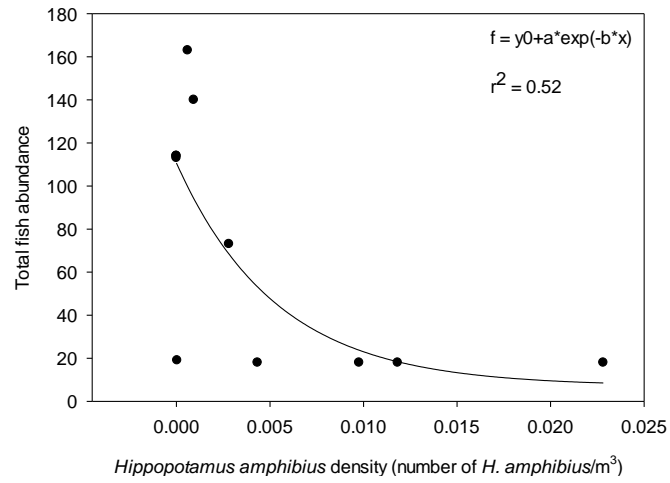

**Figure S7:** Relationship between total fish abundance and *Hippopotamus amphibius* density plotted using data from all focal *H. amphibius* pools during the dry season of 2015. These data were used to estimate the total fish abundance of all pools in the Greater Ruaha watershed.

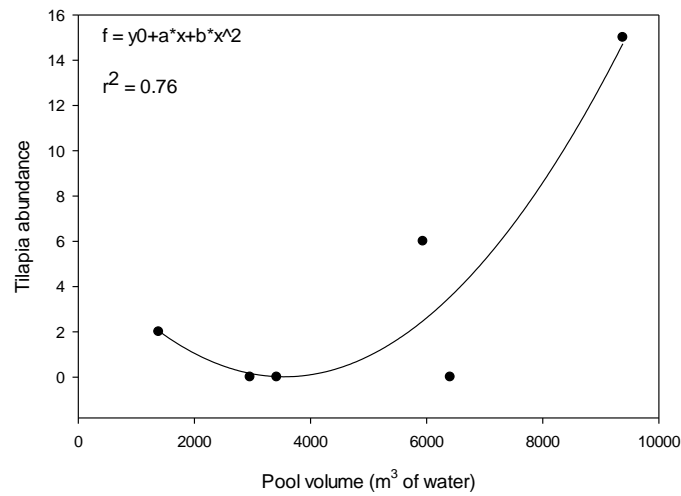

**Figure S8:** Relationship between tilapia abundance and pool volume plotted using data from high-density *H. amphibius* pools during the dry season of 2015. These data were used to estimate tilapia abundance of pools that were categorized as high-density *H. amphibius* pools in the Greater Ruaha watershed.

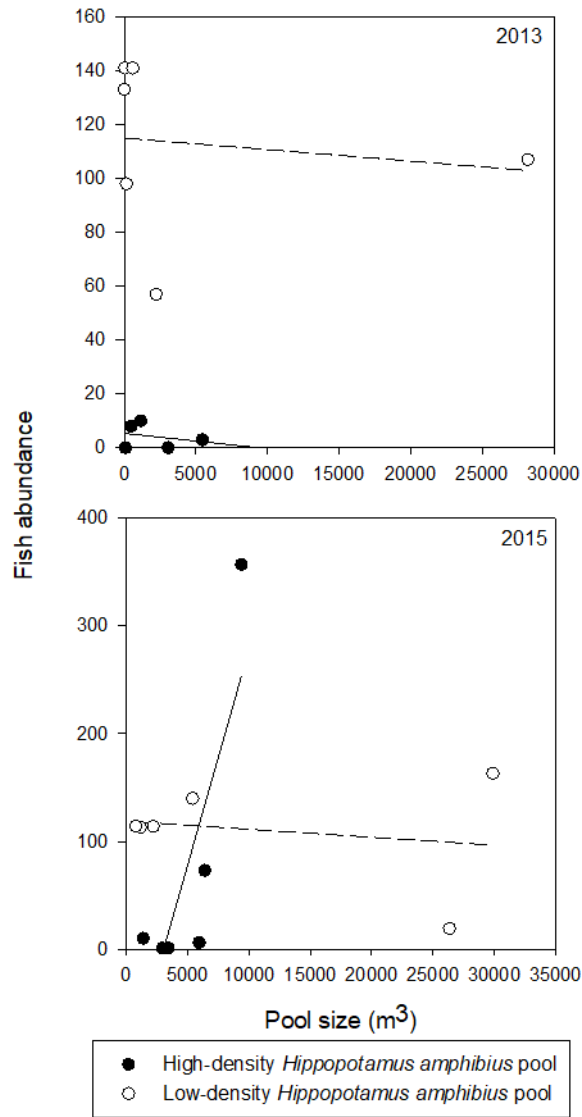

**Figure S9:** Comparison of fish abundance between low- and high-density *Hippopotamus amphibius* pools during the dry season of 2013 (top panel) and 2015 (bottom panel). Significant differences were observed between low- and high-density *H. amphibius* pools in 2013, with pool size not influencing abundance. However, in 2015, there was a significant interaction between pool size and abundance in low- and high-density pools. At smaller pool sizes, low-density *H. amphibius* pools had higher abundance of fishes. As the size of high-density *H. amphibius* pools increased, so did the abundance. In contrast, the abundance of fish remained relatively constant in low-density *H. amphibius* pools across all pool sizes.



**Table S1:** Pearson's correlation coefficient matrix for the nine water chemistry variables during the dry season of 2013. Statistically significant correlations are in bold. P values are adjusted using Holm's (1979) correction of  $\alpha$  for sequential analysis of the same null hypothesis

|      | DO            | DOC           | TDN           | TDP           | CHLA          | PH            | PP            | PC            | PN            |
|------|---------------|---------------|---------------|---------------|---------------|---------------|---------------|---------------|---------------|
| DO   | 1             | <b>-0.722</b> | <b>-0.718</b> | <b>-0.779</b> | <b>-0.697</b> | <b>0.991</b>  | <b>-0.777</b> | <b>-0.711</b> | <b>-0.714</b> |
| DOC  | <b>-0.722</b> | 1             | <b>0.805</b>  | 0.613         | <b>0.919</b>  | <b>-0.729</b> | <b>0.936</b>  | <b>0.985</b>  | <b>0.980</b>  |
| TDN  | <b>-0.718</b> | <b>0.805</b>  | 1             | <b>0.878</b>  | <b>0.732</b>  | <b>-0.741</b> | <b>0.769</b>  | <b>0.742</b>  | <b>0.743</b>  |
| TDP  | <b>-0.779</b> | 0.613         | <b>0.878</b>  | 1             | 0.485         | <b>-0.796</b> | 0.569         | 0.534         | 0.533         |
| CHLA | <b>-0.697</b> | <b>0.919</b>  | <b>0.732</b>  | 0.485         | 1             | <b>-0.711</b> | <b>0.976</b>  | <b>0.952</b>  | <b>0.966</b>  |
| PH   | <b>0.991</b>  | <b>-0.729</b> | <b>-0.741</b> | <b>-0.796</b> | <b>-0.711</b> | 1             | <b>-0.786</b> | <b>-0.709</b> | <b>-0.714</b> |
| PP   | <b>-0.777</b> | <b>0.936</b>  | <b>0.769</b>  | 0.569         | <b>0.976</b>  | <b>-0.786</b> | 1             | <b>0.959</b>  | <b>0.966</b>  |
| PC   | <b>-0.711</b> | <b>0.985</b>  | <b>0.742</b>  | 0.534         | <b>0.952</b>  | <b>-0.709</b> | <b>0.959</b>  | 1             | <b>0.998</b>  |
| PN   | <b>-0.714</b> | <b>0.980</b>  | <b>0.743</b>  | 0.533         | <b>0.966</b>  | <b>-0.714</b> | <b>0.966</b>  | <b>0.998</b>  | 1             |

**Table S2:** Pearson's correlation coefficient matrix for the nine water chemistry variables during the dry season of 2015. Statistically significant correlations are in bold. P values are adjusted using Holm's (1979) correction of  $\alpha$  for sequential analysis of the same null hypothesis

|      | DO            | DOC           | TDN           | TDP           | CHLA   | pH            | PP            | PC            | PN            |
|------|---------------|---------------|---------------|---------------|--------|---------------|---------------|---------------|---------------|
| DO   | 1             | <b>-0.726</b> | <b>-0.8</b>   | <b>-0.757</b> | 0.080  | <b>0.781</b>  | <b>-0.775</b> | <b>-0.738</b> | <b>-0.742</b> |
| DOC  | <b>-0.726</b> | 1             | <b>0.648</b>  | <b>0.726</b>  | 0.001  | <b>-0.704</b> | <b>0.888</b>  | <b>0.945</b>  | <b>0.940</b>  |
| TDN  | <b>-0.800</b> | <b>0.648</b>  | 1             | <b>0.898</b>  | -0.183 | <b>-0.722</b> | <b>0.539</b>  | <b>0.540</b>  | <b>0.520</b>  |
| TDP  | <b>-0.757</b> | <b>0.726</b>  | <b>0.898</b>  | 1             | 0.108  | <b>-0.634</b> | <b>0.534</b>  | <b>0.588</b>  | <b>0.593</b>  |
| CHLA | 0.080         | 0.001         | -0.183        | 0.108         | 1      | 0.042         | -0.170        | -0.108        | -0.040        |
| pH   | <b>0.781</b>  | <b>-0.704</b> | <b>-0.722</b> | <b>-0.634</b> | 0.042  | 1             | <b>-0.804</b> | <b>-0.762</b> | <b>-0.763</b> |
| PP   | <b>-0.775</b> | <b>0.888</b>  | 0.539         | 0.534         | -0.170 | <b>-0.804</b> | 1             | <b>0.982</b>  | <b>0.976</b>  |
| PC   | <b>-0.738</b> | <b>0.945</b>  | 0.540         | 0.588         | -0.108 | <b>-0.762</b> | <b>0.982</b>  | 1             | <b>0.996</b>  |
| PN   | <b>-0.742</b> | <b>0.940</b>  | 0.520         | 0.593         | -0.040 | <b>-0.763</b> | <b>0.976</b>  | <b>0.996</b>  | 1             |

**Table S3:** Pearson's correlation coefficient ( $r$ ) between *Hippopotamus amphibius* pool water chemistry and fish and aquatic invertebrate diversity during the dry season of 2013 and 2015. Statistically significant correlations are in bold. P values are adjusted using Holm's (1979) correction of  $\alpha$  for sequential analysis of the same null hypothesis. DO = dissolved oxygen, CHL-a = chlorophyll a, DOC = dissolved organic carbon, TDN = total dissolved nitrogen, TDP = total dissolved phosphorus, PP = particulate phosphorus, PC = particulate carbon, PN = particulate nitrogen.

|                                | DO           | CHL-a  | DOC           | TDN           | TDP           | PP            | PC            | PN            | pH           |
|--------------------------------|--------------|--------|---------------|---------------|---------------|---------------|---------------|---------------|--------------|
| <b>2013</b>                    |              |        |               |               |               |               |               |               |              |
| Fish diversity                 | 0.47         | -0.504 | <b>-0.543</b> | <b>-0.605</b> | <b>-0.562</b> | <b>-0.580</b> | <b>-0.523</b> | -0.519        | 0.508        |
| Aquatic invertebrate diversity | <b>0.775</b> | -0.451 | -0.499        | -0.476        | <b>-0.575</b> | -0.554        | -0.501        | -0.500        | <b>0.777</b> |
| <b>2015</b>                    |              |        |               |               |               |               |               |               |              |
| Fish diversity                 | <b>0.753</b> | -0.094 | -0.562        | <b>-0.653</b> | <b>-0.694</b> | <b>-0.626</b> | <b>-0.620</b> | <b>-0.632</b> | <b>0.818</b> |
| Aquatic invertebrate diversity | <b>0.622</b> | -0.122 | -0.412        | -0.519        | <b>-0.540</b> | <b>-0.547</b> | -0.510        | -0.519        | <b>0.752</b> |

**Table S4:** Relative contribution of fish and aquatic invertebrate species to the overall species composition based on the Bray–Curtis similarity between high- and low-density *H. amphibius* pools during the 2013 dry season (from SIMPER analysis). The Dissimilarity/SD is an indicator for discriminating between preference groups because it incorporates a measure of variation across samples. Larger Dissimilarity/SD values indicate a larger percent dissimilarity across groups while having a smaller standard deviation. Finally, % contribution is the overall percentage of dissimilarity each species contributes to the overall dissimilarity between treatments. Information about the behavior, ecology, and DO tolerances is unfortunately lacking for many of these groups of less well studied East African fish and invertebrate lineages. Some of the species that persisted in high-density *H. amphibius* pools are known to have capacity to tolerate low DO conditions (e.g. *Oreochromis urolepis* and *Clarias gariepinus*).

|                                    | Relative contribution of species in low-density <i>H. amphibius</i> pools | Relative contribution of species in high-density <i>H. amphibius</i> pools | Diss/SD | % Contribution |
|------------------------------------|---------------------------------------------------------------------------|----------------------------------------------------------------------------|---------|----------------|
| <b>Fish species</b>                |                                                                           |                                                                            |         |                |
| <i>Oreochromis urolepis</i>        | 5.92                                                                      | 3.41                                                                       | 1.09    | 27.51          |
| <i>Brycinus affinis</i>            | 4.07                                                                      | 1.34                                                                       | 1.09    | 18.60          |
| <i>Labeo cylindricus</i>           | 3.51                                                                      | 0                                                                          | 1.69    | 17.60          |
| <i>Astatotilapia bloyeti</i>       | 2.43                                                                      | 0                                                                          | 1.12    | 12.44          |
| <i>Clarias gariepinus</i>          | 0                                                                         | 2.89                                                                       | 0.68    | 12.30          |
| <i>Labeo coubie</i>                | 1                                                                         | 0.71                                                                       | 1.03    | 5.94           |
| <i>Labeo congoro</i>               | 0.40                                                                      | 0                                                                          | 0.66    | 1.75           |
| <i>Hydrocynus vittatus</i>         | 0.38                                                                      | 0                                                                          | 0.64    | 1.75           |
| <i>Enteromius radiates</i>         | 0.20                                                                      | 0                                                                          | 0.42    | 1.14           |
| <i>Distichodus petersi</i>         | 0.23                                                                      | 0                                                                          | 0.42    | 0.97           |
| <b>Invertebrate Order or Class</b> |                                                                           |                                                                            |         |                |
| Adult Coleoptera morphotype 1      | 6.01                                                                      | 7.53                                                                       | 1.42    | 21.42          |
| Gastropoda morphotype 1            | 1.93                                                                      | 2.25                                                                       | 1.05    | 15.83          |
| Larval Diptera morphotype 1        | 1.91                                                                      | 0                                                                          | 1.12    | 10.06          |
| Adult Coleoptera morphotype 2      | 1.01                                                                      | 1.84                                                                       | 1.16    | 9.43           |
| Larval Odonata                     | 1.64                                                                      | 0                                                                          | 0.69    | 8.72           |
| Adult Coleoptera morphotype 3      | 0                                                                         | 1.58                                                                       | 0.75    | 8.3            |
| Decapod                            | 1.45                                                                      | 0                                                                          | 0.44    | 8.27           |
| Adult Hemiptera                    | 1.21                                                                      | 0                                                                          | 0.44    | 6.58           |
| Larval Diptera morphotype 2        | 0.91                                                                      | 0                                                                          | 0.44    | 5.08           |
| Unionoida                          | 0.63                                                                      | 0                                                                          | 0.44    | 3.28           |
| Gastropoda morphotype 2            | 0.29                                                                      | 0                                                                          | 0.44    | 1.52           |
| Arhynchobdellida                   | 0.29                                                                      | 0                                                                          | 0.44    | 1.52           |

**Table S5:** Relative contribution of fish and aquatic invertebrate species to the overall species composition based on the Bray–Curtis similarity between high- and low-density *H. amphibius* pools during the 2015 dry season (from SIMPER analysis). The Dissimilarity/SD is an indicator for discriminating between preference groups because it incorporates a measure of variation across samples. Larger Dissimilarity/SD values indicate a larger percent dissimilarity across groups while having a smaller standard deviation. Finally, % contribution is the overall percentage of dissimilarity each species contributes to the overall dissimilarity between treatments. Information about the behavior, ecology, and DO tolerances is unfortunately lacking for many of these groups of less well studied East African fish and invertebrate lineages. Some of the species that persisted in high-density *H. amphibius* pools are known to have capacity to tolerate low DO conditions (e.g. *Oreochromis urolepis* and *Clarias gariepinus*).

|                                    | Relative<br>contribution of<br>species in low-<br>density <i>H.</i><br><i>amphibius</i> pools | Relative<br>contribution of<br>species in high-<br>density <i>H.</i><br><i>amphibius</i> pools | Diss/SD | %<br>Contribution |
|------------------------------------|-----------------------------------------------------------------------------------------------|------------------------------------------------------------------------------------------------|---------|-------------------|
| <b>Fish species</b>                |                                                                                               |                                                                                                |         |                   |
| <i>Oreochromis urolepis</i>        | 4.11                                                                                          | 2.75                                                                                           | 1.23    | 15.65             |
| <i>Brycinus affinis</i>            | 1.8                                                                                           | 3.24                                                                                           | 0.91    | 14.6              |
| <i>Labeo cylindricus</i>           | 3.4                                                                                           | 0                                                                                              | 1.95    | 13.15             |
| <i>Enteromius radiatus</i>         | 2.69                                                                                          | 0                                                                                              | 1.04    | 9.99              |
| <i>Enteromius lineomaculatus</i>   | 2.74                                                                                          | 0.2                                                                                            | 1.16    | 9.96              |
| <i>Schilbe intermedius</i>         | 2.55                                                                                          | 0                                                                                              | 1.21    | 9.38              |
| <i>Labeo coubie</i>                | 2.12                                                                                          | 0                                                                                              | 0.89    | 9.31              |
| <i>Labeo congoro</i>               | 1.8                                                                                           | 0                                                                                              | 1.78    | 6.77              |
| <i>Synodontis matthesi</i>         | 0                                                                                             | 1.92                                                                                           | 0.59    | 6.26              |
| <i>Distichodus petersi</i>         | 0.89                                                                                          | 0                                                                                              | 0.95    | 3.77              |
| <i>Clarias gariepinus</i>          | 0                                                                                             | 0.2                                                                                            | 0.44    | 0.63              |
| <i>Astatotilapia bloyeti</i>       | 0.14                                                                                          | 0                                                                                              | 0.43    | 0.53              |
| <b>Invertebrate Order or Class</b> |                                                                                               |                                                                                                |         |                   |
| Decapod                            | 2.81                                                                                          | 2.92                                                                                           | 0.9     | 16.13             |
| Adult Coleoptera morphotype 1      | 2.84                                                                                          | 3.7                                                                                            | 1.21    | 14.43             |
| Adult Coleoptera morphotype 2      | 0.9                                                                                           | 3.24                                                                                           | 0.91    | 13.28             |
| Gastropoda morphotype 1            | 3.20                                                                                          | 0                                                                                              | 1.30    | 12.39             |
| Larval Odonata                     | 3.04                                                                                          | 0                                                                                              | 1.07    | 11.91             |
| Adult Coleoptera morphotype 3      | 0                                                                                             | 2.85                                                                                           | 0.78    | 11.24             |
| Larval Diptera morphotype 1        | 2.09                                                                                          | 0                                                                                              | 1.11    | 7.99              |
| Larval Diptera morphotype 2        | 1.54                                                                                          | 0                                                                                              | 0.69    | 6.06              |
| Gastropoda morphotype 2            | 0.83                                                                                          | 0                                                                                              | 0.44    | 3.37              |
| Gastropoda morphotype 3            | 0.36                                                                                          | 0                                                                                              | 0.44    | 1.65              |
| Unionoida                          | 0.31                                                                                          | 0                                                                                              | 0.44    | 1.20              |
| Adult Hemiptera                    | 0.07                                                                                          | 0                                                                                              | 0.44    | 0.34              |

**Table S6:** Relative contribution of fish and aquatic invertebrates to the overall species composition based on the Bray–Curtis similarity between high- and low-density *H. amphibius* pools during the 2015 wet season (from SIMPER analysis). The Dissimilarity/SD is an indicator for discriminating between preference groups because it incorporates a measure of variation across samples. Larger Dissimilarity/SD values indicate a larger percent dissimilarity across groups while having a smaller standard deviation. Finally, % contribution is the overall percentage of dissimilarity each species contributes to the overall dissimilarity between treatments. Information about the behavior, ecology, and DO tolerances is unfortunately lacking for many of these groups of less well studied East African fish and invertebrate lineages. Some of the species that persisted in high-density *H. amphibius* pools are known to have capacity to tolerate low DO conditions (e.g. *Oreochromis urolepis* and *Clarias gariepinus*).

|                                    | Relative<br>contribution of<br>species in low-<br>density <i>H.</i><br><i>amphibius</i> pools | Relative<br>contribution of<br>species in high-<br>density <i>H.</i><br><i>amphibius</i> pools | Diss/SD | %<br>Contribution |
|------------------------------------|-----------------------------------------------------------------------------------------------|------------------------------------------------------------------------------------------------|---------|-------------------|
| <b>Fish species</b>                |                                                                                               |                                                                                                |         |                   |
| <i>Oreochromis urolepis</i>        | 5.27                                                                                          | 2.74                                                                                           | 1.38    | 16.98             |
| <i>Brycinus affinis</i>            | 3.21                                                                                          | 3.45                                                                                           | 1.28    | 16.15             |
| <i>Labeo congoro</i>               | 0.63                                                                                          | 3.25                                                                                           | 1.21    | 12.32             |
| <i>Labeo coubie</i>                | 2.98                                                                                          | 2.91                                                                                           | 1.45    | 12.24             |
| <i>Labeo cylindricus</i>           | 1.76                                                                                          | 2.57                                                                                           | 1.13    | 10.88             |
| <i>Distichodus petersi</i>         | 0.56                                                                                          | 1.93                                                                                           | 1.06    | 8.04              |
| <i>Astatotilapia bloyeti</i>       | 1.16                                                                                          | 0.89                                                                                           | 0.88    | 5.67              |
| <i>Enteromius radiatus</i>         | 1.18                                                                                          | 0.54                                                                                           | 1.11    | 5.43              |
| <i>Enteromius lineomaculatus</i>   | 0.9                                                                                           | 0.98                                                                                           | 1.06    | 4.9               |
| <i>Schilbe intermedius</i>         | 0.23                                                                                          | 0.7                                                                                            | 0.5     | 3.01              |
| <i>Clarias gariepinus</i>          | 0                                                                                             | 0.59                                                                                           | 0.61    | 2.36              |
| <i>Synodontis matthesi</i>         | 0                                                                                             | 0.49                                                                                           | 0.58    | 2.02              |
| <b>Invertebrate Order or Class</b> |                                                                                               |                                                                                                |         |                   |
| Adult Gastropoda morphotype 1      | 5.31                                                                                          | 2.45                                                                                           | 1.29    | 24.84             |
| Larval Odonata                     | 5.17                                                                                          | 6.05                                                                                           | 1.28    | 17.73             |
| Adult Coleoptera morphotype 1      | 3.38                                                                                          | 1.69                                                                                           | 1.32    | 17.27             |
| Decapod                            | 0.65                                                                                          | 1.72                                                                                           | 0.97    | 8.95              |
| Larval Diptera morphotype 1        | 1.32                                                                                          | 1.11                                                                                           | 1.21    | 8.4               |
| Adult Coleoptera morphotype 2      | 0.76                                                                                          | 1.25                                                                                           | 1.01    | 7.27              |
| Larval Diptera morphotype 2        | 1.24                                                                                          | 0.74                                                                                           | 1.39    | 6.48              |
| Adult Hemiptera                    | 0.43                                                                                          | 1.19                                                                                           | 0.89    | 6.3               |
| Unionoida                          | 0.1                                                                                           | 0.38                                                                                           | 0.5     | 1.99              |
| Gastropoda morphotype 2            | 0.17                                                                                          | 0                                                                                              | 0.31    | 0.76              |

**Table S7:** The current and predicted status of flow regimes in African freshwater bodies inhabited by *Hippopotamus amphibius*.

| Country*     | Hippo abundance** | Water source       | Status                                                                | Anthropogenic threat                                                                    | Reference |
|--------------|-------------------|--------------------|-----------------------------------------------------------------------|-----------------------------------------------------------------------------------------|-----------|
| Botswana     | 2,000-4,000       | Okavango Delta     | Current and projected decrease in water flow                          | Climate change and water abstraction for agriculture, mining, and industry.             | 1, 2      |
|              |                   | Chobe River        | Current decrease in annual flood area                                 | Climate change and water abstraction                                                    | 3         |
|              |                   | Linyati River      | Data Deficient                                                        |                                                                                         |           |
| Burkina-Faso | 1,500-2,000       | Comoé-Léraba River | Current and projected decrease in water flow                          | Climate change and water abstraction                                                    | 4         |
|              |                   | Mékrou River       | Increase in discharge                                                 | Land cover change surrounding the river results in increased runoff and river discharge | 5         |
|              |                   | Sourou River       | Current and projected decrease in water flow                          | Climate change and water abstraction                                                    | 4         |
|              |                   | Black Volta River  | Increase in dry season discharge and decrease in wet season discharge | Land cover change around the river causes an increase in dry season base flow           | 6         |
|              |                   | Bougouriba River   | Current and projected decrease in water flow                          | Climate change and water abstraction                                                    | 4         |
|              |                   | Arli River         | Current and projected decrease in water flow                          | Climate change and water abstraction                                                    | 4         |

Table S7 continued

| Country*                         | Hippo abundance** | Water source  | Status                                       | Anthropogenic threat                    | Reference |
|----------------------------------|-------------------|---------------|----------------------------------------------|-----------------------------------------|-----------|
| Cameroon                         | 1,500-2,000       | Bénoué River  | Current and projected decrease in water flow | Climate change and water abstraction    | 4         |
|                                  |                   | Chari River   | Current and projected decrease in water flow | Climate change and water abstraction    | 4         |
|                                  |                   | Faro River    | Current and projected decrease in water flow | Climate change and water abstraction    | 4         |
|                                  |                   | Deo River     | Current and projected decrease in water flow | Climate change and water abstraction    | 4         |
| Democratic Republic of the Congo | 5,000             | Congo River   | Current and projected decrease in water flow | Climate induced reduction in rainfall   | 7         |
|                                  |                   | Bome River    | Data Deficient                               |                                         |           |
|                                  |                   | Rusizi River  | Data Deficient                               |                                         |           |
|                                  |                   | Aka River     | Data Deficient                               |                                         |           |
|                                  |                   | Dungu River   | Data Deficient                               |                                         |           |
|                                  |                   | Garamba River | Data Deficient                               |                                         |           |
| Ethiopia                         | 2,500             | Omo River     | Projected decrease in water flow             | Water abstraction to meet water demands | 8         |
|                                  |                   | Awash River   | Increased drought frequency and severity     | Climate change                          | 9         |



Table S7 continued

| Country* | Hippo abundance** | Water source     | Status                                              | Anthropogenic threat                                                                            | Reference |
|----------|-------------------|------------------|-----------------------------------------------------|-------------------------------------------------------------------------------------------------|-----------|
| Ethiopia | 2,500             | Great Abbi River | Data Deficient                                      |                                                                                                 |           |
|          |                   | Gibe River       | Data Deficient                                      |                                                                                                 |           |
|          |                   | Lake Abaya       | Current and projected further decrease in lake size | Climate change and increased sedimentation from misuse of land and resources around the river   | 10        |
|          |                   | Lake Hawassa     | Increase in lake size                               | Increased runoff from land use change                                                           | 11        |
|          |                   | Lake Langano     | Decrease in lake size                               |                                                                                                 | 12        |
|          |                   | Lake Ziway       | Decrease in lake size                               |                                                                                                 | 13        |
|          |                   | Lake Chamo       | Current and projected further decrease in lake size | Climate change and increased sedimentation from misuse of land and resources around the river   | 10        |
| Kenya    | 5,000-7,000       | Lake Victoria    | Data Deficient                                      |                                                                                                 |           |
|          |                   | Mara Basin       | Current and projected decrease in water flow        | Reduced flow from water abstraction for irrigation, livestock, human uses, and other industries | 14, 15    |
| Malawi   | 3,000             | Lake Malawi      | Data Deficient                                      |                                                                                                 |           |

Table S7 continued

| Country*   | Hippo abundance** | Water source      | Status                                       | Anthropogenic threat                                                                                       | Reference |
|------------|-------------------|-------------------|----------------------------------------------|------------------------------------------------------------------------------------------------------------|-----------|
| Malawi     | 3,000             | Shire River       | Current increased variability in river flow  | Land cover change surrounding the river create greater variability in flow resulting in reduced base flows | 16        |
| Mozambique | 3,000             | Lake Cabora Bassa | Data Deficient                               |                                                                                                            |           |
|            |                   | Zambezi River     | Current and projected decrease in water flow | Climate change and decreased flow from the construction of dams and increased agriculture                  | 17, 18    |
|            |                   | Maputo River      | Data Deficient                               |                                                                                                            |           |
|            |                   | Save River        | Data Deficient                               |                                                                                                            |           |
|            |                   | Pungwe River      | Projected decrease in water flow             | Climate change creating greater variability in dry season flow                                             | 19        |
|            |                   | Ruvuma River      | Seasonal variation in natural flow           | None documented                                                                                            |           |
| Namibia    | 3,500             | Linyati River     | Data Deficient                               |                                                                                                            |           |
|            |                   | Zambezi River     | Current and projected decrease in water flow | Climate change and decreased flow from the construction of dams and increased agriculture                  | 17        |
|            |                   | Chobe River       | Current decrease in annual flood area        | Climate change and water abstraction                                                                       | 3         |
|            |                   | Kwando River      | Data Deficient                               |                                                                                                            |           |

Table S7 continued

| <b>Country*</b> | <b>Hippo abundance**</b> | <b>Water source</b> | <b>Status</b>                                                       | <b>Anthropogenic threat</b>                                                                                | <b>Reference</b> |
|-----------------|--------------------------|---------------------|---------------------------------------------------------------------|------------------------------------------------------------------------------------------------------------|------------------|
| Namibia         | 3,500                    | Okavango River      | Data Deficient                                                      |                                                                                                            |                  |
| South Africa    | 7,000                    | Pongola river       | Current decrease in water flow                                      | Construction of dams reduced overall river flow                                                            | 20               |
|                 |                          | Lake St. Lucia      | Current loss of inflow into the lake, reducing the size of the lake | Redirection of river flowing in to the lake as well as water abstraction from rivers flowing into the lake | 21               |
|                 |                          | Kosi Bay            | Data Deficient                                                      |                                                                                                            |                  |
|                 |                          | Crocodile River     | Current decrease in water flow                                      | Water abstractions for agriculture, domestic consumption, inter-basin transfers, industry, and mining      | 22               |
|                 |                          | Olifants River      | Current decrease in water flow                                      | Water abstractions for agriculture, domestic consumption, inter-basin transfers, industry, and mining      | 22               |
|                 |                          | Letaba River        | Current decrease in water flow                                      | Water abstractions for agriculture, domestic consumption, inter-basin transfers, industry, and mining      | 22               |
|                 |                          | Shingwedzi River    | Data Deficient                                                      |                                                                                                            |                  |

Table S7 continued

| <b>Country*</b> | <b>Hippo abundance**</b> | <b>Water source</b> | <b>Status</b>                                | <b>Anthropogenic threat</b>                                                                   | <b>Reference</b> |
|-----------------|--------------------------|---------------------|----------------------------------------------|-----------------------------------------------------------------------------------------------|------------------|
| South Africa    | 7,000                    | Sabie River         | Current decrease in water flow               | Water abstractions for agriculture, domestic consumption, industry, and mining                | 22               |
|                 |                          | Limpopo River       | Current decrease in water flow               | Reduced flow from water abstraction from weirs and dams                                       | 23               |
| South Sudan     | 2,000-3,000              | White Nile River    | Data Deficient                               |                                                                                               |                  |
|                 |                          | Tonj River          | Data Deficient                               |                                                                                               |                  |
|                 |                          | Jur (Sue) River     | Data Deficient                               |                                                                                               |                  |
| Tanzania        | 20,000                   | Kilombero River     | Current and projected decrease in water flow | Climate change and water abstraction for irrigation                                           | 24               |
|                 |                          | Rufiji River        | Current and projected decrease in water flow | Climate change and water abstraction for agriculture, livestock, and growing human population | 24               |
|                 |                          | Ugalla River        | Current and projected decrease in water flow | Climate change and water abstraction for agriculture and livestock                            | 25, 26           |
|                 |                          | Great Ruaha River   | Current and projected decrease in water flow | Climate change and water abstraction for agriculture                                          | 27               |

Table S7 continued

| Country* | Hippo abundance** | Water source      | Status                                       | Anthropogenic threat                                                                                         | Reference  |
|----------|-------------------|-------------------|----------------------------------------------|--------------------------------------------------------------------------------------------------------------|------------|
| Tanzania | 20,000            | Malagarassi River | Current and projected decrease in water flow | Climate change and reduced flow competing and unsustainable uses of land-based resources in upper catchments | 28         |
|          |                   | Mara Basin        | Current and projected decrease in water flow | Climate change and water abstraction for irrigation, livestock, human uses, and other industries             | 14, 15, 29 |
| Uganda   | 7,000-10,000      | Lake Victoria     | Data Deficient                               |                                                                                                              |            |
|          |                   | Lake Kyoga        | Data Deficient                               |                                                                                                              |            |
|          |                   | Semliki River     | Data Deficient                               |                                                                                                              |            |
|          |                   | Kazinga channel   | Data Deficient                               |                                                                                                              |            |
|          |                   | White Nile        | Data Deficient                               |                                                                                                              |            |
| Zambia   | 40,000-45,000     | Luangwa River     | Data Deficient                               |                                                                                                              |            |
|          |                   | Zambezi River     | Current and projected decrease in water flow | Climate change and decreased flow from dam construction and increased agriculture                            | 17         |
|          |                   | Kafue River       | Current                                      | Dams for hydroelectric power altered natural flooding regimes                                                | 30         |
|          |                   | Lufupa River      | Data Deficient                               |                                                                                                              |            |

Table S7 continued

| <b>Country*</b> | <b>Hippo abundance**</b> | <b>Water source</b> | <b>Status</b>                                | <b>Anthropogenic threat</b>                                                               | <b>Reference</b> |
|-----------------|--------------------------|---------------------|----------------------------------------------|-------------------------------------------------------------------------------------------|------------------|
| Zimbabwe        | 5,000                    | Zambezi River       | Current and projected decrease in water flow | Climate change and decreased flow from the construction of dams and increased agriculture | 17               |
|                 |                          | Limpopo River       | Current decrease in water flow               | Reduced flow from water abstraction from weirs and dams                                   | 23               |

\*Only countries with *Hippopotamus amphibius* populations >1000 individuals were used for this assessment

\*\**Hippopotamus amphibius* abundance estimates obtained from the IUCN for *H. amphibius* (31)

## References for Supporting Information

1. Mbaiwa JE (2004) Causes and possible solutions to water resource conflicts in the Okavango River Basin: the case of Angola, Namibia and Botswana. *Phys Chem Earth* 29: 1319–1326.
2. Pinheiro I, Gabaake G, & Heyns P (2003) Cooperation in the Okavango River Basin: The OKACOM perspective. *Transboundary Rivers, Sovereignty and Development: Hydropolitical Drivers in the Okavango River Basin*, eds Turton A, Ashton P, Cloete E. (African Water Issues Research Unit/Green Cross International/University of Pretoria, Pretoria).
3. Pricope NG (2013) Variable-source flood pulsing in a semi-arid transboundary watershed: the Chobe River, Botswana and Namibia. *Environ Monit Assess* 185: 1883–1906.
4. Niasse M (2005) Climate-induced water conflict risks in West Africa: recognizing and coping with increasing climate impacts on shared watercourses, in *Human Security and Climate Change*. (Oslo: IUCN – West Africa Regional Office).
5. Descroix L, Mahé G, Lebel T, Favreau G, Galle S, Gautier E, Olivry J-C, Albergel J, Amogu O, Cappelaere B, Dessouassi R, Diedhiou A, Le Breton E, Mamadou I & Sighomnou D (2009) Spatio-temporal variability of hydrological regimes around the boundaries between Sahelian and Sudanian areas of West Africa: a synthesis. *J Hydrol* 375: 90–102
6. Oguntunde PG, Friesen J, van de Giesen N & Savenije HHG (2006) Hydroclimatology of the Volta River Basin in West Africa: trends and variability from 1901 to 2002. *Phys Chem Earth* 31: 1180–1188.
7. Kazadi S-N & Kaoru F (1996) Interannual and long-term climate variability over the Zaire River Basin during the last 30 years. *J Geophys Res* 101: 21351–21360
8. Avery S (2012) Lake Turkana and the Lower Omo: hydrological impacts of major dam and irrigation developments. (University of Oxford).
9. Edossa DC, Babel MS & Gupta AS (2010) Drought analysis in the Awash River Basin, Ethiopia. *Water Resour Manag* 24: 1441–1460
10. Awulachew SB (2006) Modelling natural conditions and impacts of consumptive water use and sedimentation of Lake Abaya and Lake Chamo, Ethiopia. *Lakes & Reservoirs: Research and Management* 11: 73–82
11. Wondrade N, Dick ØB & Tveite H (2014). GIS based mapping of land cover changes utilizing multi-temporal remotely sensed image data in Lake Hawassa Watershed, Ethiopia. *Environ Monit Assess* 186: 1765–1780
12. Bewketu K & Ayenew T (2015) Hydrodynamics of selected Ethiopian Rift Lakes. *Civil and Environmental Research* 7: 46–60
13. Legesse D & Ayenew T (2006) Effect of improper water and land use resource utilization on the central Main Ethiopian Rift lakes. *Quatern Int* 148: 8–18
14. Mutie SM, Mati B, Home P, Gadain H & Gathenya J. 2006. Evaluating land use change effects on river flow using USGS geospatial stream flow model in Mara River basin, Kenya. In: *Proceedings of 2<sup>nd</sup> workshop of the EARSeL SIG on land use and land cover*, Bonn, pp 141 – 148, 28 – 30 September 2006.

15. LVBC & WWF-ESARPO (2010) Assessing Reserve Flows for the Mara River. Nairobi and Kisumu, Kenya.
16. Palamuleni LG, Ndomba PM & Annegarn HJ (2011) Evaluating land cover change and its impact on hydrological regime in Upper Shire river catchment, Malawi. *Reg Environ Change* 11: 845–855.
17. Kling H, Stanzel P & Preishuber M (2014) Impact modelling of water resources development and climate scenarios on Zambezi River discharge. *J Hydrol: Regional Studies* 1: 17–43.
18. Beck L & Bernauer T (2011) How will combined changes in water demand and climate effect water availability in the Zambezi river basin? *Global Environ Chang* 21: 1061–1072.
19. Andersson L, Samuelsson P & Kjellström E (2011) Assessment of climate change impact on water resources in the Pungwe river basin. *Tellus* 63: 138–157.
20. Jaganyi J, Salagae M, & Matiwane N (2008) Integrating floodplain livelihoods into a diverse rural economy by enhancing co-operative management: a case study of the Pongolo floodplain system, South Africa. (WRC Report No. 1299/1/08. Pretoria, South Africa: Water Research Commission).
21. Whitefield AK & Taylor RH (2009) A review of the importance of freshwater inflow to the future conservation of Lake St Lucia. *Aquat Conserv* 19: 838–848.
22. Pollard S, Mallory S, Riddell E, & Sawunyama T (2010) Compliance with the Reserve. How do the Lowveld Rivers Measure up? Towards improving the Assessment and Implementation of the Ecological Reserve. (Water Research Commission, Project K8/881/2. South Africa)
23. Jacobsen NHG & Kleynhans CJ (1993) The importance of weirs as refugia for hippopotami and crocodiles in the Limpopo River, South Africa. *Water SA* 19: 301–306.
24. Beekman HE, Abu-Zeid K, Afouda A, Hughes S, Kane A, Kulindwa KA, Odade EO, Opere A, Oyebande L & Saayman IC (2005) Facing the facts: assessing the vulnerability of Africa's water resources to environmental change. (Early Warning and Assessment Report Series, UNEP/DEWA/RS, United National Environmental Programme, Nairobi, Kenya).
25. Mtahiko MGG, Gereta E, Kajuni AR, Chiombola EAT, Ng'umbi GZ, Coppolillo P & Wolanski E (2006) Towards an ecohydrology-based restoration of the Usangu wetlands and the Great Ruaha River, Tanzania. *Wetl Ecol Manag* 14:489–503.
26. Mwakalila S (2005) Water resource use in the Great Ruaha Basin of Tanzania. *Phys Chem Earth* 30: 11–16.
27. Hazelhurst S & Milner D (2007) Watershed assessment of the Ugalla landscape. USDA Forest Service Technical Assistance Trip. (USAID/USDA/Africare, Tanzania).
28. DANIDA, 1999. Environment, Peace and Stability Facility Environmental Support Programme. (Sustainable and Integrated Management of the Malagarasi–Muyovozi Ramsar Site, Ministry of Foreign Affairs, Tanzania).
29. Gereta E, Wolanski EJ, Borner M & Serneels S (2002) Use of an ecohydrological model to predict the impact on the Serengeti ecosystem of deforestation, irrigation and the



proposed Amala weir water diversion project in Kenya. *Ecohydrology & Hydrobiology* 2: 127–134.

30. Smardon RC (2009) The Kafue Flats in Zambia, Africa: a lost floodplain? *Sustaining the World's Wetlands*, ed Smardon RC (Springer, New York).
31. Lewison RL & Pluháček J (2017) *Hippopotamus amphibius*. The IUCN Red List of Threatened Species 2017: e.T10103A18567364.
